# Supplementary material for: Graphene-templated formation of two-dimensional lepidocrocite nanostructures for high-efficiency catalytic degradation of phenols
Source: Royal Society of Chemistry journal article supplement (doi:10.1039/c0ee00495b), 2011-01-01
Supplement: c0ee00495b.pdf [file c0ee00495b.pdf]

## Supporting Information

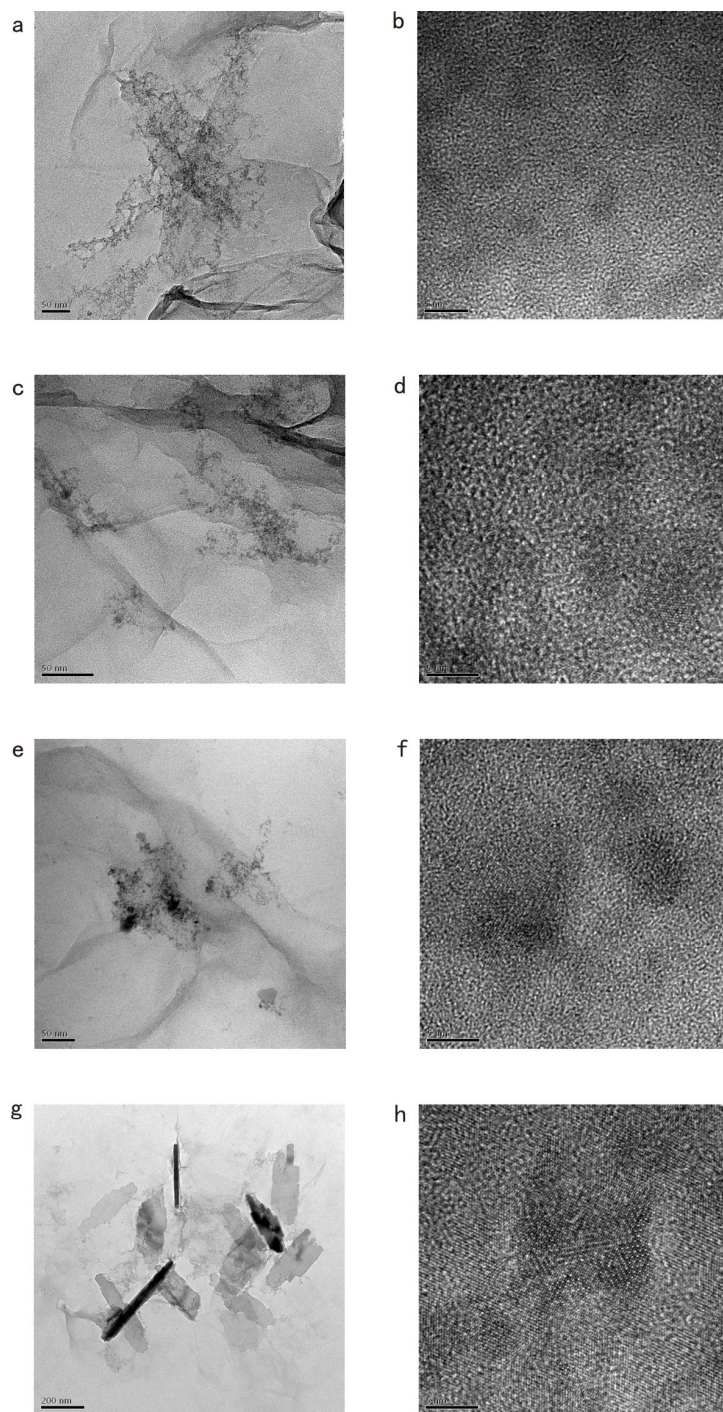

Figure S1. TEM and HRTEM imaging of ultrathin single crystal lepidocrocite nanosheets. a, TEM image of Fe-G 5%. b, HRTEM image of Fe-G 5%. c, TEM image of Fe-G 10%. d, HRTEM image of Fe-G 10%. e, TEM image of Fe-G 15%. f, HRTEM image of Fe-G 5%. g, TEM image of Fe-G 20%. h, HRTEM image of Fe-G 20%.

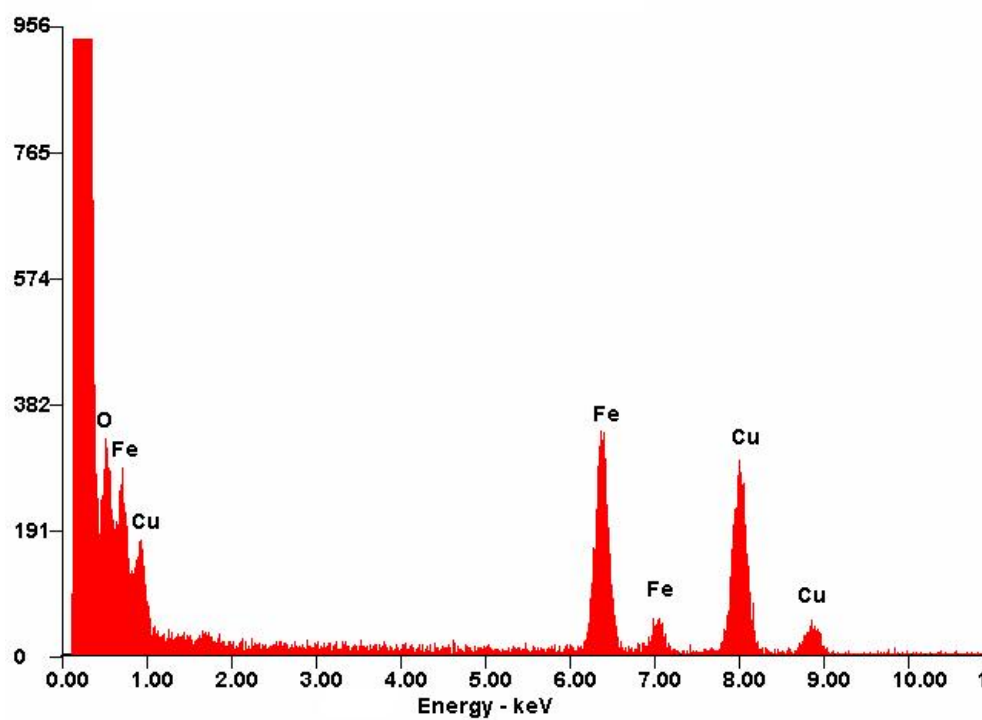

Figure S2. EDS spectrum of ultrathin single crystal lepidocrocite nanosheets.

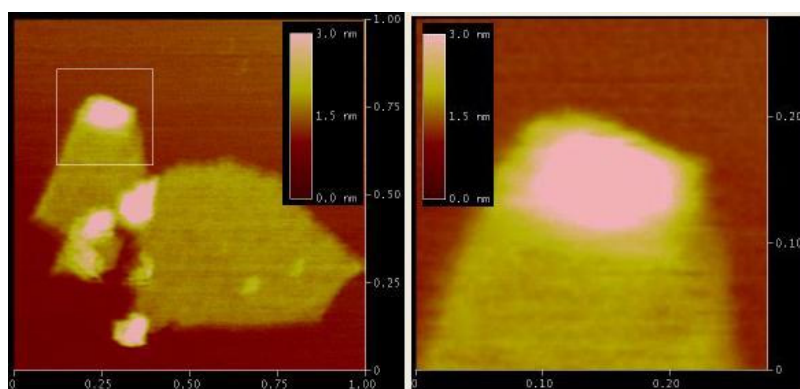

(a)

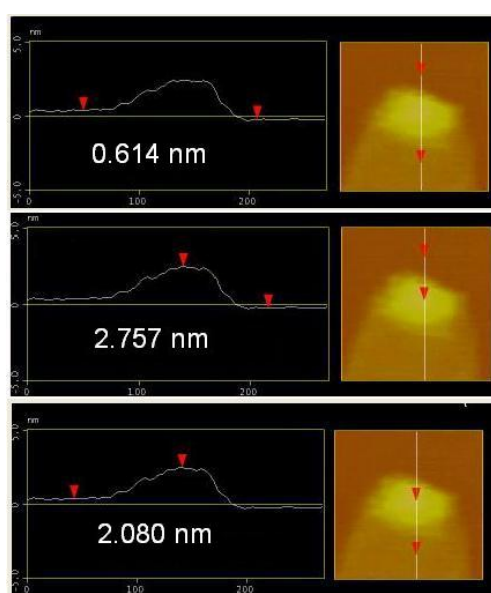

(b)

Figure S3. a) AFM image of nanosheets; b) Height analysis in AFM. Height for graphene + Fe nanosheets is 2.8 nm, graphene alone is 0.6 nm, thus the Fe nanosheet is 2.1 nm.

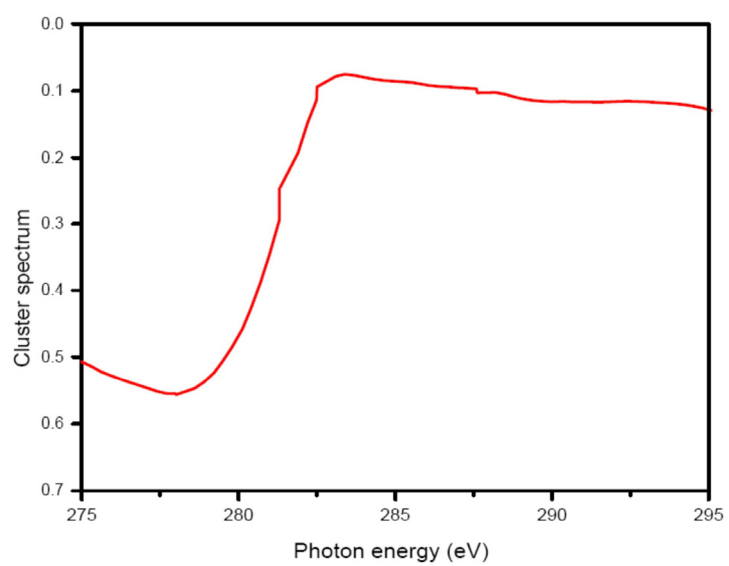

Figure S4. NEXAFS spectrum of reduced graphene oxide in Fe-G 20% nanocomplex.

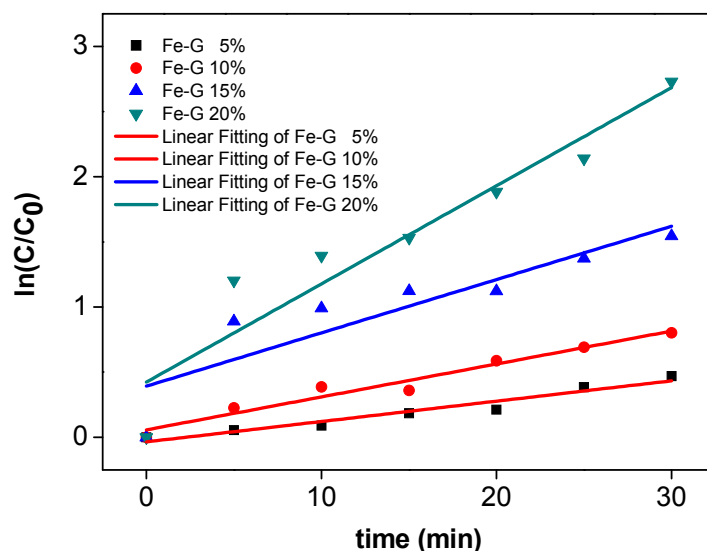

Figure S5. Data fitting with the first-rate reaction kinetics for phenol degradation with Fe-G nanostructures of different Fe contents (shown in Fig. 5e).

The equation for the first-order reaction kinetics is

$$C/C_0 = a + b \times e^{-kt} \quad (1)$$

where “C” and “C<sub>0</sub>” are the concentration and original concentration of phenol, “t” is the reaction time and “k” stands for the first-order reaction rate, “a” and “b” are the fitting constants.

This equation can be transformed to

$$t = a + k \times \ln(C/C_0) \quad (2)$$

By using the equation (2), the phenol degradation data can be linearly fitted for the first 30 min ( $R^2$  is Correlation coefficient).

The following table is the parameters for fitting and the  $k$  values.

|          | $a$    | $k(\text{min}^{-1})$ | $R^2$ |
|----------|--------|----------------------|-------|
| Fe-G 5%  | -0.035 | 0.016                | 0.940 |
| Fe-G 10% | 0.057  | 0.025                | 0.954 |
| Fe-G 15% | 0.392  | 0.041                | 0.752 |
| Fe-G 20% | 0.423  | 0.075                | 0.885 |

The  $k$  values are also reported in Table 1.

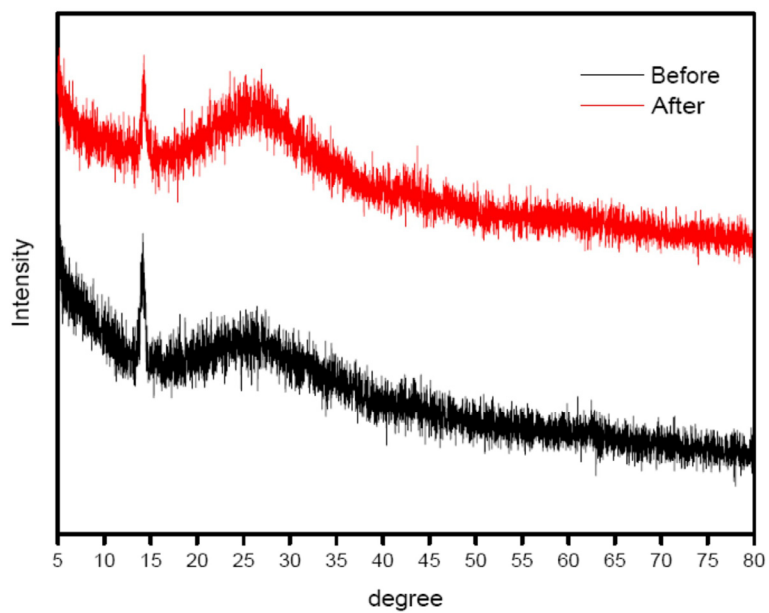

Figure S6. XRD patterns of Fe-G 20% before and after phenol treatment.

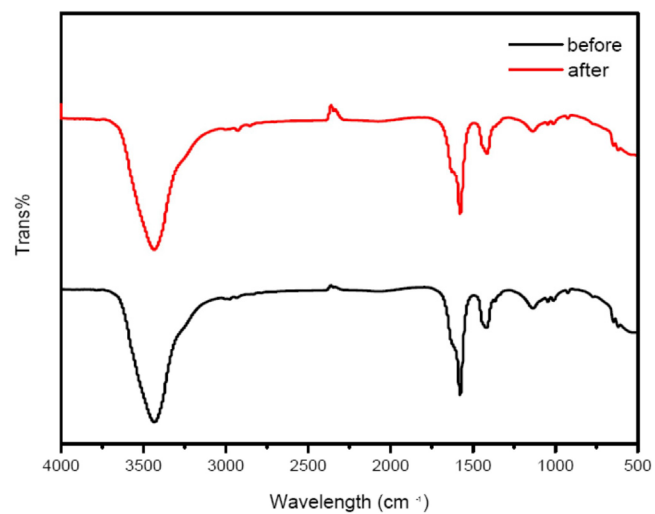

Figure S7. FTIR spectra of Fe-G 20% before and after phenol treatment.

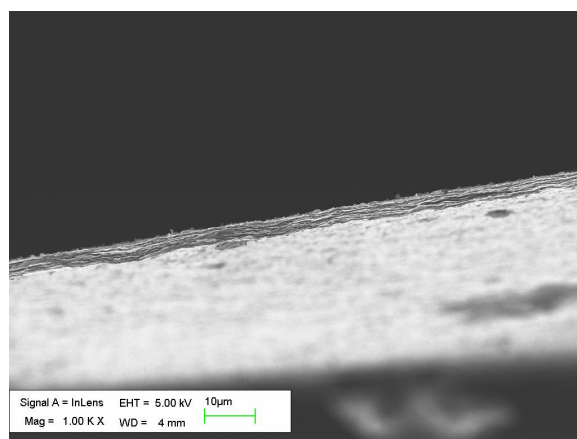

Figure S8. SEM image of the nanosheet sample for XRD characterization.
